# Supplementary material for: Stress responses upon starvation and exposure to bacteria in the ant Formica exsecta
Source: PeerJ journal article supplement (doi:10.7717/peerj.6428), 2019-02-18

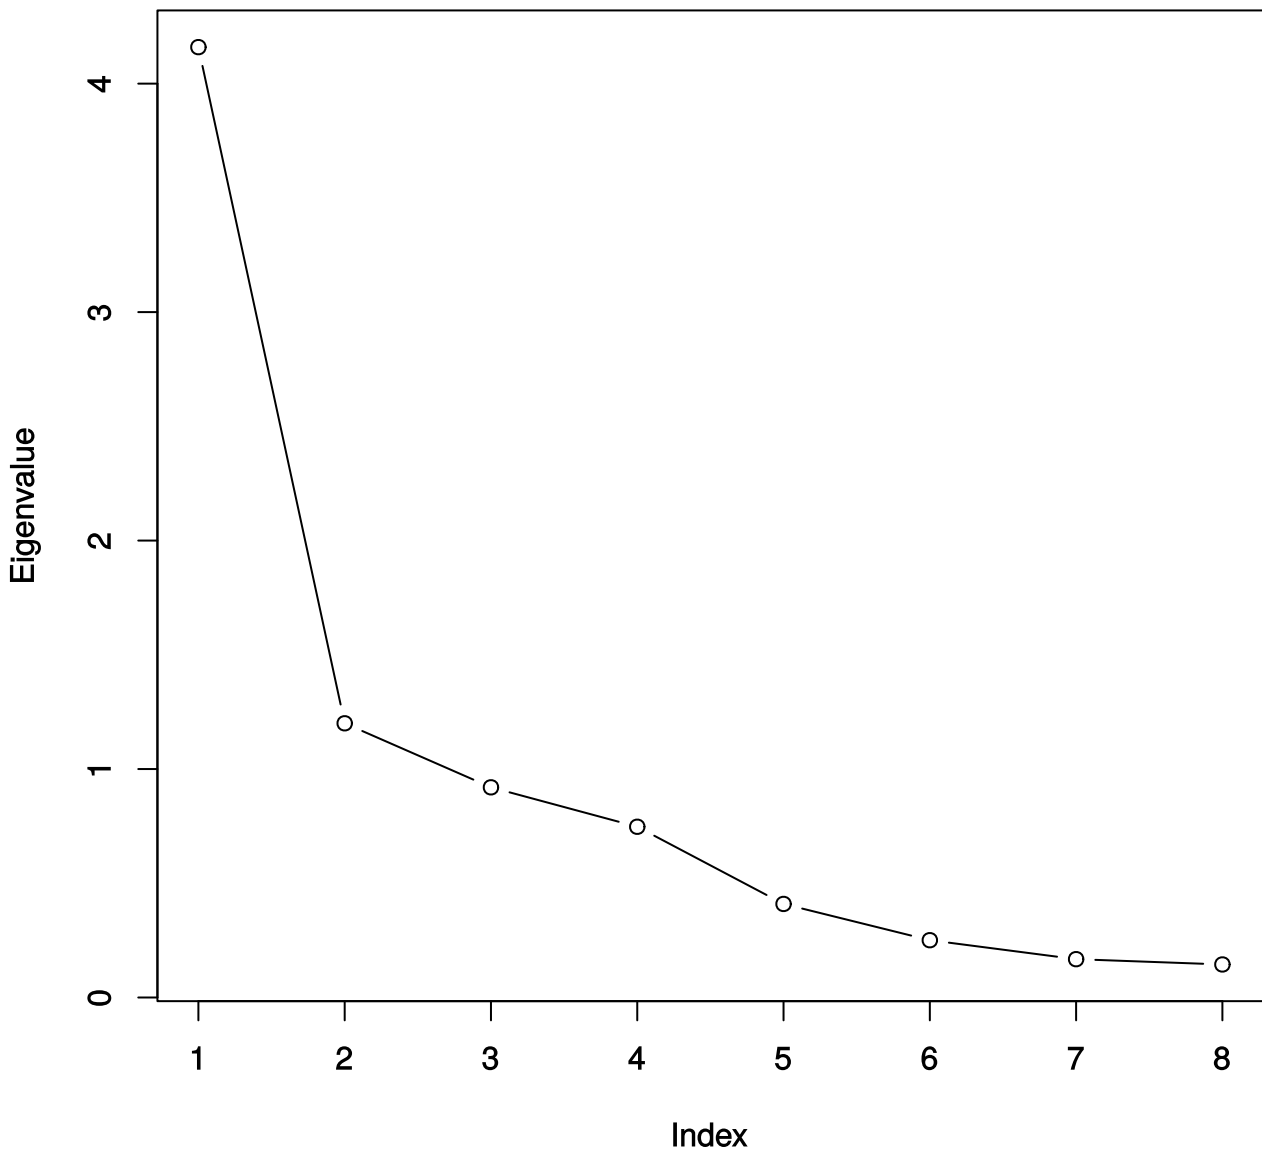

Supplement: FigureS1_ScreePlot.pdf [file FigureS1_ScreePlot.pdf]
