# Supplementary material for: Stress responses upon starvation and exposure to bacteria in the ant Formica exsecta
Source: PeerJ journal article supplement (doi:10.7717/peerj.6428), 2019-02-18

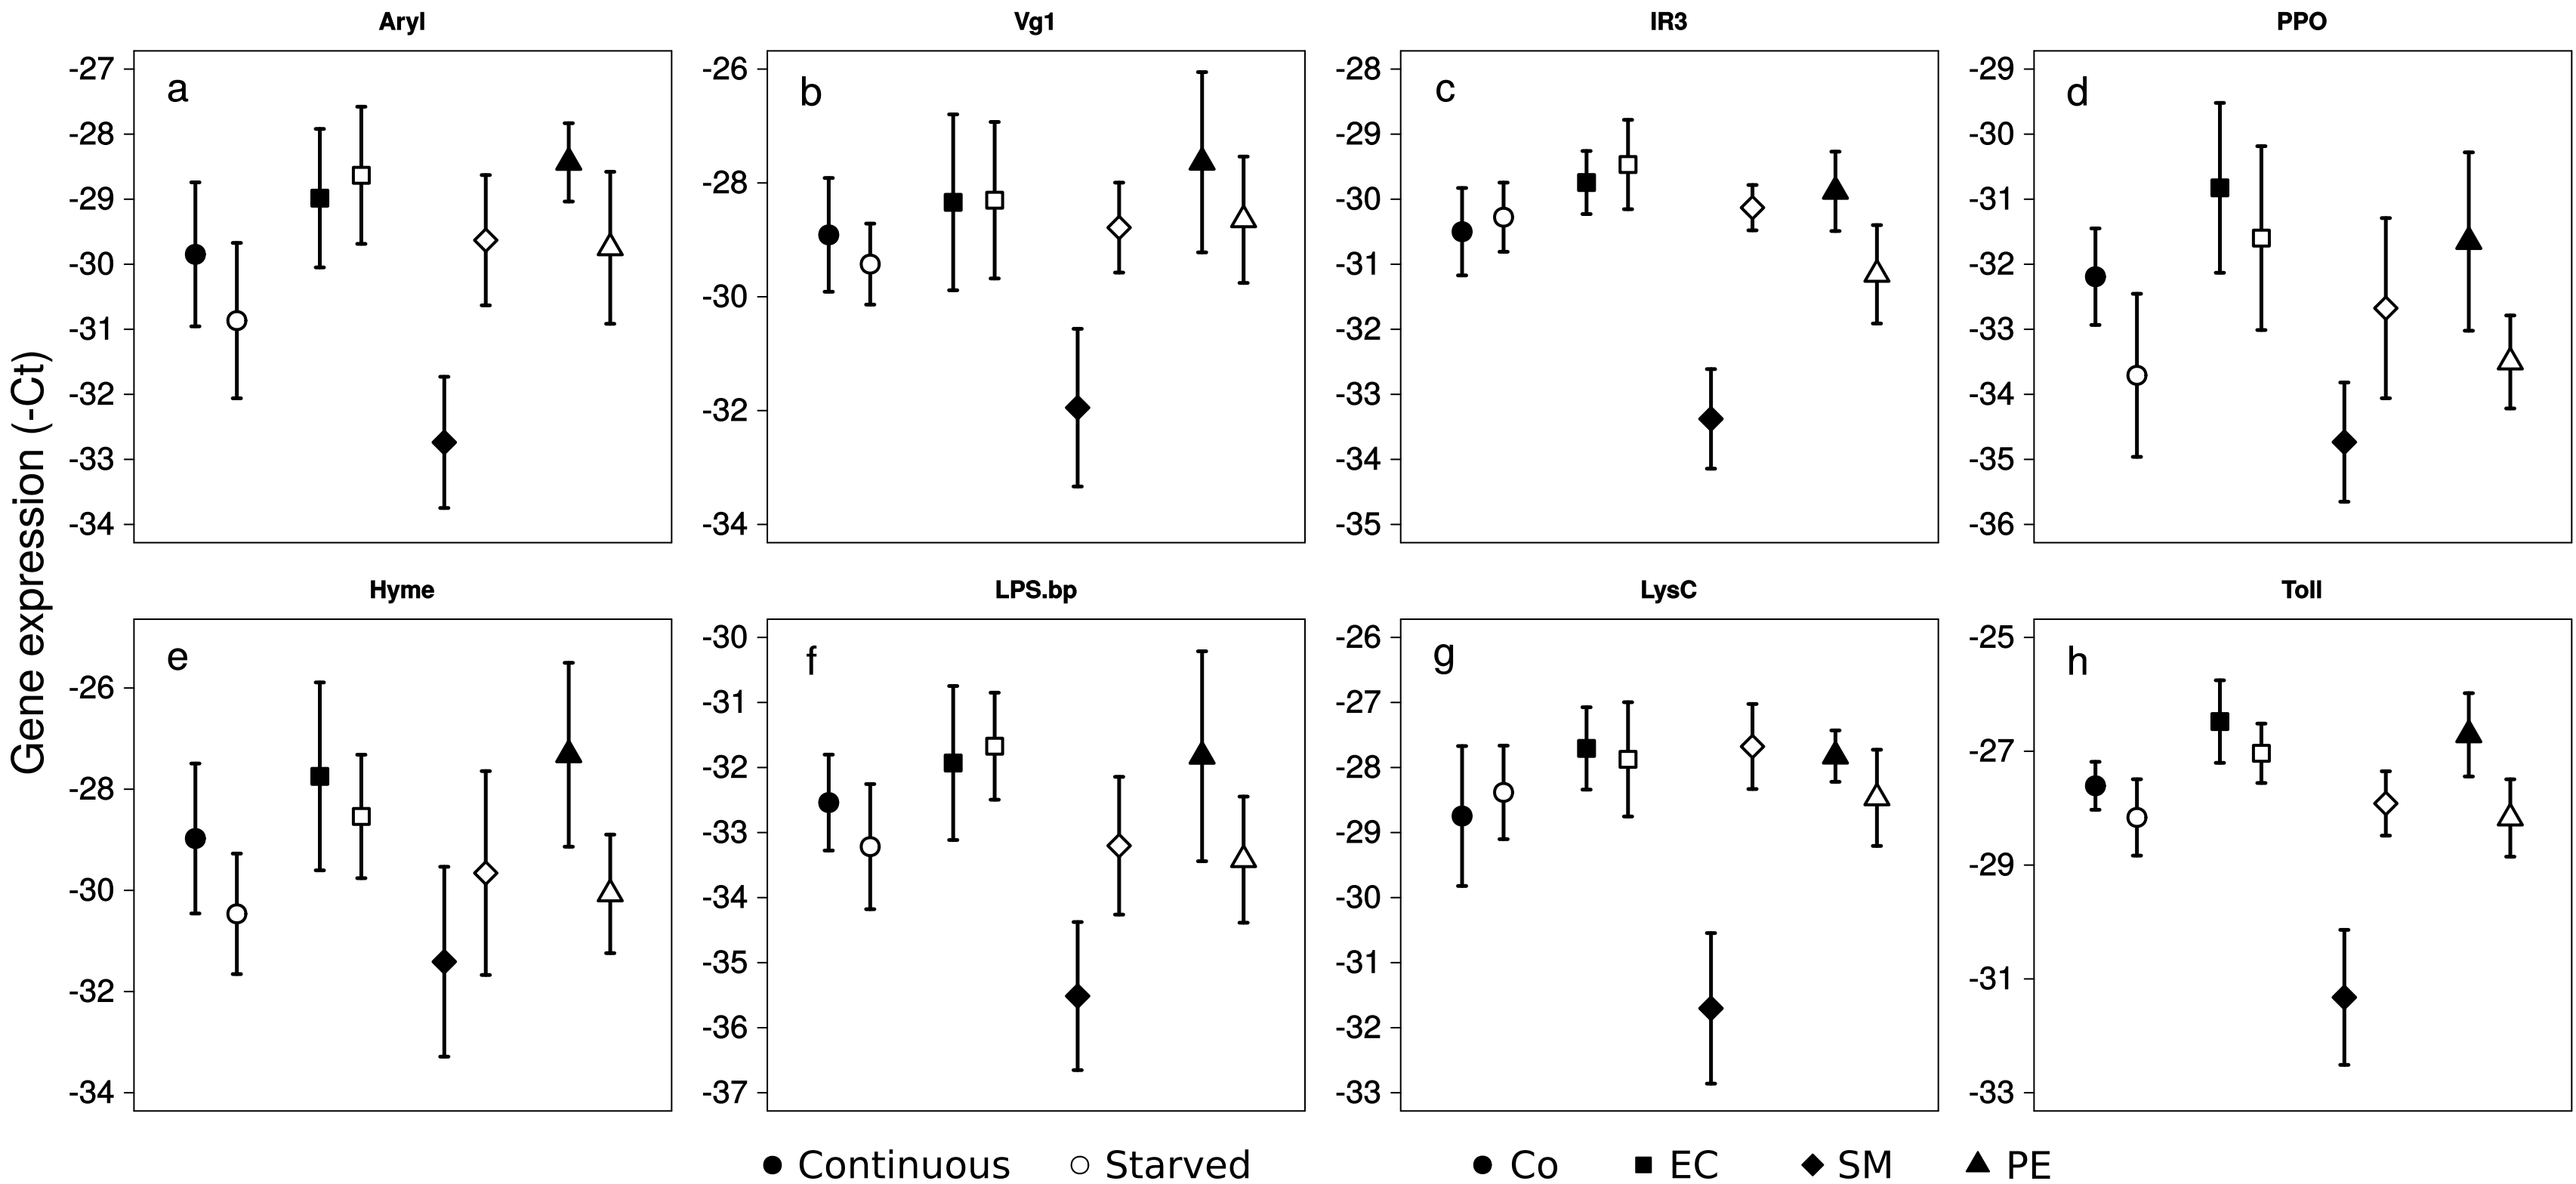

Supplement: FigureS2_Stuckietal_StressResponses_PeerJ.pdf [file FigureS2_Stuckietal_StressResponses_PeerJ.pdf]
