# Supplementary material for: Stress responses upon starvation and exposure to bacteria in the ant Formica exsecta
Source: PeerJ journal article supplement (doi:10.7717/peerj.6428), 2019-02-18
Supplement: Supp1_SupplementaryTables_Stuckietal_StressResponses_PeerJ.pdf [file Supp1_SupplementaryTables_Stuckietal_StressResponses_PeerJ.pdf]

## **Stress responses upon starvation and exposure to bacteria in the ant *Formica exsecta***

Dimitri Stucki<sup>1,2</sup>, Dalial Freitak<sup>1,2</sup>, Nick Bos<sup>1,2,3</sup> & Liselotte Sundström<sup>1,2</sup>

1) Organismal and Evolutionary Biology Research Programme, Faculty of Biological and Environmental Sciences, University of Helsinki, PO Box 65 (Viikinkaari 1), FI-00014 Helsinki, Finland

2) Tvärminne Zoological Station, University of Helsinki, FI-10900 Hanko, Finland

3) Section for Ecology & Evolution, Department of Biology, University of Copenhagen, 2100 Copenhagen, Denmark

## **Supplementary Tables**

**Table S1:** The Primer sequences used for qPCR gene expression analysis.

| Gene                | Forward                          | Reverse                          | Efficiency |
|---------------------|----------------------------------|----------------------------------|------------|
| Arylphorin          | 5'-ACT TAG AAC GCC TGT CCA AC-3' | 5'-GAG ATT CCA TGT CCT CCA AG-3' | 99.9       |
| Hymenoptaecin       | 5'-TGG CAA AGA CGG TTT CAT CA-3' | 5'-AAC CAC CAG TTA CAC CAA CC-3' | 102.4      |
| Insulin Receptor 3  | 5'-GCG AGC GTT TTC TGT AGG TA-3' | 5'-CCC AGG AGC TCG ATA ACA AC-3' | 105.0      |
| LPS-binding protein | 5'-CCA CCG TGT AAC GAT AAT CA-3' | 5'-TTG ACG TCA TCG GTC AAT AG-3' | 102.9      |
| Lysozyme C          | 5'-CAC CAT CCT TCT TCT TCG TT-3' | 5'-AGG TGG CAT CTG TAA CAA GC-3' | 91.6       |
| Pro-Phenoloxidase   | 5'-TCC AAC TGC TGT AGG CTG TA-3' | 5'-ACC TTC ACA ATC TCG GTC AT-3' | 96.4       |
| Toll-receptor       | 5'-GCT CCT TCG TGA CCT AGT CG-3' | 5'-GTG AAA GCG CCA TTA TCC AT-3' | 102.4      |
| Vitellogenin 1      | 5'-AGG TTG TCA TCG TCA ACG AA-3' | 5'-CGT TGC TTG TAG GGG ATA GG-3' | 98.3       |

**Table S2:** Eigenvalues and variance from the PCA on gene expression.

|                        | PC1  | PC2  | PC3  | PC4  | PC5  | PC6  | PC7  | PC8  |
|------------------------|------|------|------|------|------|------|------|------|
| Eigenvalue             | 4.16 | 1.20 | 0.92 | 0.75 | 0.41 | 0.25 | 0.17 | 0.14 |
| Proportion of Variance | 0.52 | 0.15 | 0.11 | 0.09 | 0.05 | 0.03 | 0.02 | 0.02 |
| Cumulative Variance    | 0.52 | 0.67 | 0.78 | 0.88 | 0.93 | 0.96 | 0.98 | 1.00 |

**Table S3:** Loadings for PC2 from a preliminary PCA.

| Gene                | Loading |
|---------------------|---------|
| Arylphorin          | -0.36   |
| Vitellogenin 1      | -0.67   |
| Insulin Receptor 3  | 0.02    |
| Pro-Phenoloxidase   | 0.48    |
| Hymenoptaecin       | 0.29    |
| LPS-binding protein | 0.53    |
| Lysozyme C          | -0.14   |
| Toll-receptor       | -0.02   |

**Table S4:** Results for PC2 from a preliminary linear mixed effects model on PC2-scores.

|                                | $\beta \pm \text{SE}$ | t     | p-value |
|--------------------------------|-----------------------|-------|---------|
| Starved                        | -0.34 $\pm$ 0.47      | -0.71 | 0.48    |
| <i>E. coli</i>                 | 0.17 $\pm$ 0.47       | 0.37  | 0.72    |
| <i>S. marcescens</i>           | 0.05 $\pm$ 0.47       | 0.11  | 0.92    |
| <i>P. entomophila</i>          | -0.20 $\pm$ 0.47      | -0.42 | 0.67    |
| Starved* <i>E. coli</i>        | 0.11 $\pm$ 0.67       | 0.16  | 0.87    |
| Starved* <i>S. marcescens</i>  | -0.17 $\pm$ 0.67      | -0.26 | 0.80    |
| Starved* <i>P. entomophila</i> | -0.16 $\pm$ 0.67      | -0.23 | 0.82    |

**Table S5:** Results from separate pairwise comparisons of gene expression for each gene. Comparisons were performed between Treatments (Continuously exposed (C), Starved (S)) within each Exposure regime, as well as between each bacterial Exposure regime (Control exposure (Co), *S. marcescens* (SM), *E. coli* (EC), *P. entomophila* (PE)) within each Treatment. All p-values were adjusted for multiple comparisons using false discovery rates.

|              | Aryl           |       |        | Vg1            |       |        | IR3            |       |        | PPO            |        |        |
|--------------|----------------|-------|--------|----------------|-------|--------|----------------|-------|--------|----------------|--------|--------|
|              | $\beta \pm SE$ | z     | adj.p  | $\beta \pm SE$ | z     | adj.p  | $\beta \pm SE$ | z     | adj.p  | $\beta \pm SE$ | z      | adj.p  |
| C/Co vs S/Co | 1.02±0.64      | 1.60  | 0.5551 | 0.51±0.71      | 0.72  | 0.6371 | -0.22±0.38     | -0.59 | 0.6371 | 1.52±0.70      | 2.16   | 0.4925 |
| C/EC vs S/EC | -0.35±0.64     | -0.55 | 0.9584 | -0.04±0.71     | -0.05 | 0.9584 | -0.28±0.38     | -0.73 | 0.9584 | 0.77±0.70      | 1.10   | 0.9584 |
| C/SM vs S/SM | -3.11±0.64     | -4.88 | 0.0000 | -3.16±0.71     | -4.43 | 0.0001 | -3.25±0.38     | -8.54 | 0.0000 | -2.06±0.70     | -2.93  | 0.0123 |
| C/PE vs S/PE | 1.31±0.64      | 2.06  | 0.1203 | 1.01±0.71      | 1.41  | 0.3601 | 1.28±0.38      | 3.36  | 0.0120 | 1.85±0.70      | 2.64   | 0.0509 |
| C/Co vs C/EC | -0.86±0.64     | -1.36 | 0.3454 | -0.57±0.71     | -0.80 | 0.6161 | -0.76±0.38     | -1.99 | 0.2384 | -1.37±0.70     | -1.95  | 0.2384 |
| S/Co vs S/EC | -2.23±0.64     | -3.50 | 0.0117 | -1.12±0.71     | -1.57 | 0.3542 | -0.81±0.38     | -2.13 | 0.0943 | -2.11±0.70     | -3.01  | 0.0425 |
| C/Co vs C/PE | -1.41±0.64     | -2.22 | 0.2950 | -1.28±0.71     | -1.79 | 0.3167 | -0.62±0.38     | -1.63 | 0.3167 | -0.54±0.70     | -0.77  | 0.4976 |
| S/Co vs S/PE | -1.12±0.64     | -1.76 | 0.5151 | -0.78±0.71     | -1.09 | 0.9824 | 0.88±0.38      | 2.31  | 0.3343 | -0.21±0.70     | -0.29  | 0.9824 |
| C/Co vs C/SM | 2.89±0.64      | 4.53  | 0.0000 | 3.04±0.71      | 4.25  | 0.0001 | 2.88±0.38      | 7.57  | 0.0000 | 2.54±0.70      | 3.62   | 0.0018 |
| S/Co vs S/SM | -1.24±0.64     | -1.94 | 0.8221 | -0.64±0.71     | -0.90 | 0.8247 | -0.15±0.38     | -0.39 | 0.8247 | -1.03±0.70     | -1.47  | 0.8221 |
| C/EC vs C/SM | 3.75±0.64      | 5.89  | 0.0000 | 3.61±0.71      | 5.05  | 0.0000 | 3.63±0.38      | 9.56  | 0.0000 | 3.91±0.70      | 5.57   | 0.0000 |
| S/EC vs S/SM | 1.00±0.64      | 1.57  | 0.3135 | 0.48±0.71      | 0.67  | 0.7042 | 0.66±0.38      | 1.74  | 0.3135 | 1.08±0.70      | 1.53   | 0.3200 |
| C/EC vs C/PE | -0.55±0.64     | -0.86 | 0.9350 | -0.70±0.71     | -0.99 | 0.9350 | 0.14±0.38      | 0.36  | 0.9350 | 0.83±0.70      | 1.18   | 0.9350 |
| S/EC vs S/PE | 1.11±0.64      | 1.75  | 0.2060 | 0.34±0.71      | 0.48  | 0.7213 | 1.69±0.38      | 4.44  | 0.0002 | 1.90±0.70      | 2.71   | 0.0573 |
| C/SM vs C/PE | -4.30±0.64     | -6.75 | 0.0000 | -4.31±0.71     | -6.03 | 0.0000 | -3.50±0.38     | -9.20 | 0.0000 | -3.08±0.70     | -4.39  | 0.0001 |
| S/SM vs S/PE | 0.12±0.64      | 0.18  | 0.9031 | -0.14±0.71     | -0.19 | 0.9031 | 1.02±0.38      | 2.70  | 0.1286 | 0.83±0.70      | 1.18   | 0.7868 |
|              | Hyme           |       |        | LPS-bp         |       |        | LysC           |       |        | Toll           |        |        |
|              | $\beta \pm SE$ | z     | adj.p  | $\beta \pm SE$ | z     | adj.p  | $\beta \pm SE$ | z     | adj.p  | $\beta \pm SE$ | z      | adj.p  |
| C/Co vs S/Co | 1.49±0.98      | 1.51  | 0.5551 | 0.68±0.67      | 1.01  | 0.6371 | -0.36±0.50     | -0.73 | 0.6371 | 0.56±0.44      | 1.26   | 0.5551 |
| C/EC vs S/EC | 0.79±0.98      | 0.81  | 0.9584 | -0.26±0.67     | -0.39 | 0.9584 | 0.17±0.50      | 0.34  | 0.9584 | 0.56±0.44      | 1.26   | 0.9584 |
| C/SM vs S/SM | -1.75±0.98     | -1.78 | 0.1991 | -2.31±0.67     | -3.46 | 0.0029 | -4.03±0.50     | -8.07 | 0.0000 | -3.41±0.44     | -7.71  | 0.0000 |
| C/PE vs S/PE | 2.75±0.98      | 2.80  | 0.0551 | 1.59±0.67      | 2.38  | 0.0708 | 0.64±0.50      | 1.29  | 0.3601 | 1.46±0.44      | 3.31   | 0.0120 |
| C/Co vs C/EC | -1.23±0.98     | -1.25 | 0.4516 | -0.61±0.67     | -0.91 | 0.6032 | -1.04±0.50     | -2.08 | 0.2384 | -1.13±0.44     | -2.55  | 0.1718 |
| S/Co vs S/EC | -1.92±0.98     | -1.96 | 0.2143 | -1.54±0.67     | -2.31 | 0.0885 | -0.51±0.50     | -1.02 | 0.4492 | -1.13±0.44     | -2.55  | 0.0573 |
| C/Co vs C/PE | -1.66±0.98     | -1.68 | 0.3167 | -0.71±0.67     | -1.07 | 0.4976 | -0.92±0.50     | -1.85 | 0.3167 | -0.90±0.44     | -2.03  | 0.2950 |
| S/Co vs S/PE | -0.39±0.98     | -0.40 | 0.9824 | 0.20±0.67      | 0.30  | 0.9824 | 0.08±0.50      | 0.17  | 0.9824 | 0.01±0.44      | 0.02   | 0.9824 |
| C/Co vs C/SM | 2.44±0.98      | 2.48  | 0.0530 | 2.97±0.67      | 4.45  | 0.0001 | 2.96±0.50      | 5.93  | 0.0000 | 3.72±0.44      | 8.42   | 0.0000 |
| S/Co vs S/SM | -0.81±0.98     | -0.82 | 0.8247 | -0.01±0.67     | -0.02 | 0.9831 | -0.71±0.50     | -1.41 | 0.8247 | -0.25±0.44     | -0.56  | 0.8247 |
| C/EC vs C/SM | 3.66±0.98      | 3.73  | 0.0016 | 3.58±0.67      | 5.36  | 0.0000 | 4.00±0.50      | 8.01  | 0.0000 | 4.85±0.44      | 10.97  | 0.0000 |
| S/EC vs S/SM | 1.12±0.98      | 1.14  | 0.4949 | 1.53±0.67      | 2.29  | 0.2950 | -0.20±0.50     | -0.40 | 0.8412 | 0.88±0.44      | 1.99   | 0.2950 |
| C/EC vs C/PE | -0.43±0.98     | -0.43 | 0.9350 | -0.10±0.67     | -0.16 | 0.9350 | 0.12±0.50      | 0.24  | 0.9350 | 0.23±0.44      | 0.53   | 0.9350 |
| S/EC vs S/PE | 1.53±0.98      | 1.56  | 0.3080 | 1.74±0.67      | 2.61  | 0.0582 | 0.59±0.50      | 1.19  | 0.4315 | 1.14±0.44      | 2.57   | 0.0573 |
| C/SM vs C/PE | -4.09±0.98     | -4.16 | 0.0005 | -3.69±0.67     | -5.51 | 0.0000 | -3.88±0.50     | -7.77 | 0.0000 | -4.61±0.44     | -10.44 | 0.0000 |
| S/SM vs S/PE | 0.41±0.98      | 0.42  | 0.9031 | 0.21±0.67      | 0.32  | 0.9031 | 0.79±0.50      | 1.58  | 0.7868 | 0.26±0.44      | 0.58   | 0.9031 |
